# Supplementary material for: LaNiO3-nanorod/graphene composite as an efficient bi-functional catalyst for zinc–air batteries
Source: Royal Society of Chemistry journal article supplement (doi:10.1039/c6ra16610e), 2016-01-01

### Supporting Figure Captions

Fig. S1 (a) AFM image of the as-synthesized RGO, (b) the corresponding cross-section analysis of RGO on the silicon substrate

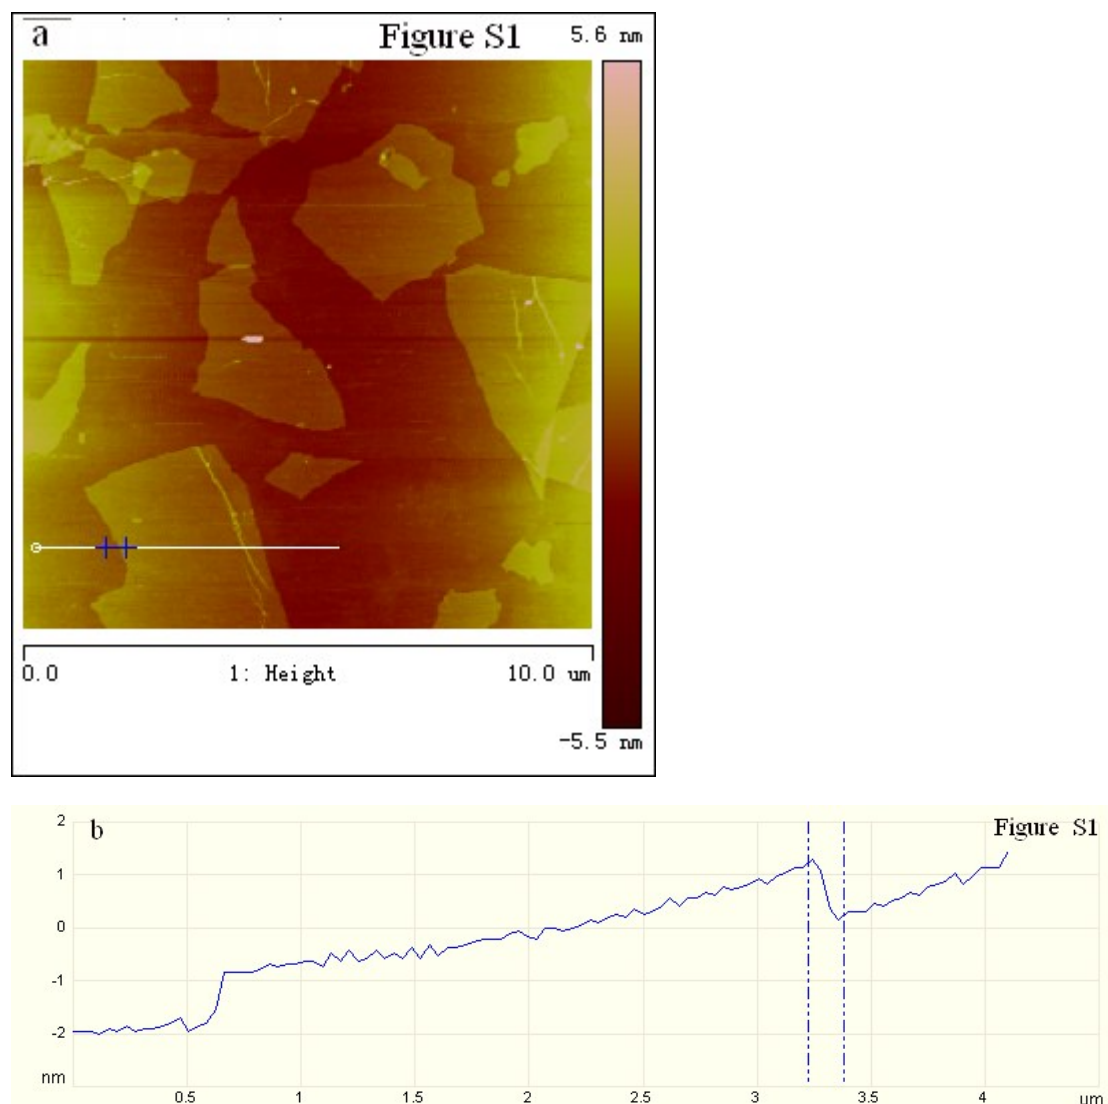

Fig. S2 FT-IR spectrum of RGO

Figure S2

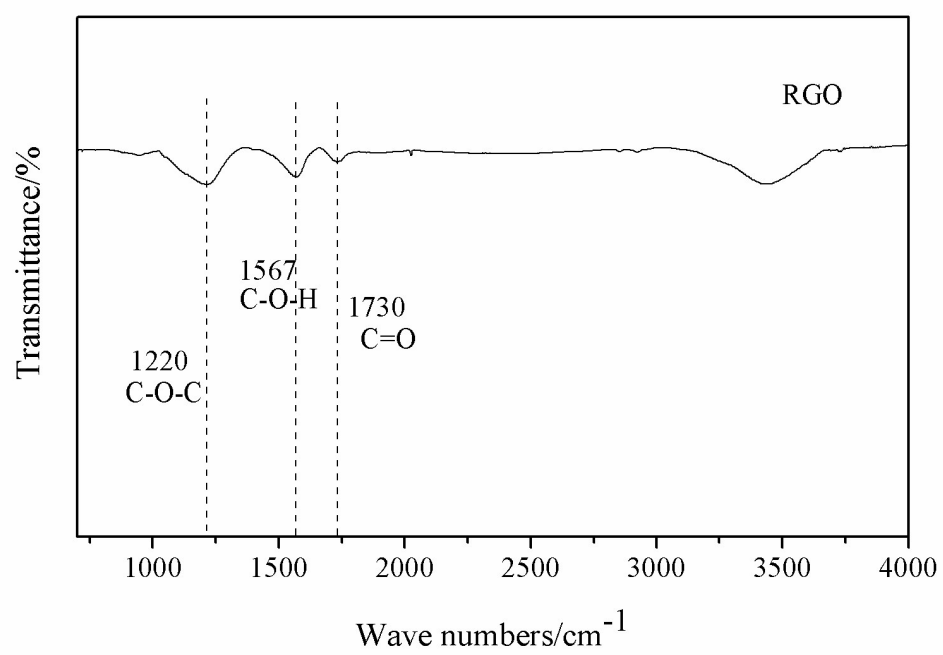

Supplement: c6ra16610e1.pdf [file c6ra16610e1.pdf]
